# Supplementary material for: The Relationship between Endophytic Fungi of Chimonanthus praecox and Volatile Metabolites under Different Circadian Rhythms and Blooming Stages
Source: MDPI journal article supplement (doi:10.3390/jof10020145), 2024-02-11
Supplement: s1 [file s1]

## Supplementary marterials

# Relationship between Endophytic Fungi of *Chimonanthus praecox* and Volatile Metabolites Under Different Circadian Rhythms and Blooming Stages

Yue Li <sup>1</sup>, Jingying Hei <sup>2</sup>, Xiahong He <sup>2</sup>, Rui Rui <sup>1,2\*</sup> and Shu Wang <sup>1,2\*</sup>

**Table S1.** Summary of sample sequencing information

| Sample | Sequence Number | Base Number | Average Length | Shortest Sequence Length | Maximum sequence Length |
|--------|-----------------|-------------|----------------|--------------------------|-------------------------|
| GUA    | 72546           | 17717762    | 376            | 360                      | 465                     |
| GUB    | 74339           | 17883713    | 41             | 158                      | 468                     |
| GUC    | 71521           | 17182720    | 240            | 164                      | 448                     |
| GOA    | 73417           | 17209111    | 234            | 153                      | 501                     |
| GOB    | 71944           | 16810275    | 234            | 145                      | 512                     |
| GOC    | 72771           | 17515452    | 241            | 171                      | 453                     |

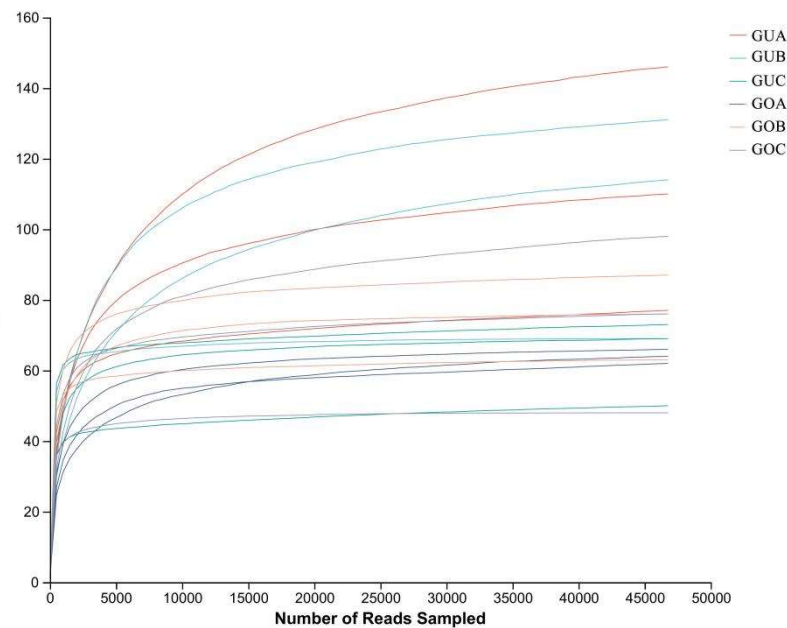

**Figure S1.** Sequencing data results in endophytic fungi of *C. praecox* OTU dilution curve

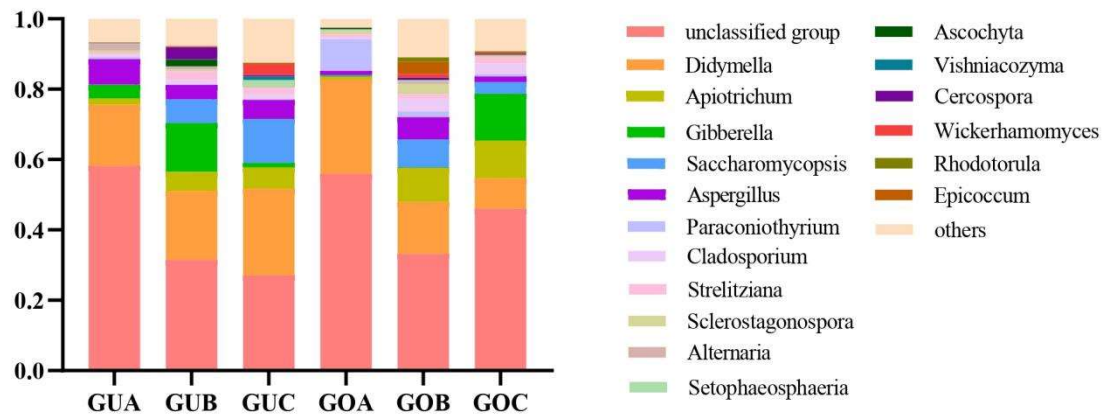

**Figure S2.** Community structure of endophytic fungi of *C. praecox* at genus level.

**Table S2.** Floral volatile emitted from *C. praecox* with different blooming stages and circadian rhythms

| RT*(min.)   | LRI* | Compounds               | 7:00 AM    | 13:00 PM    | 19:00 PM  |
|-------------|------|-------------------------|------------|-------------|-----------|
| 3.92        | 865  | Cyclohepta-1,3,5-triene | 1.13/0.33  | 0.69/0.33   | 0.79/0.3  |
| 12.36       | 868  | $\alpha$ -Terpinene     | -/1.72     | 0.11/-      | -/-       |
| 46.18/40.16 | 951  | Germacrene D            | 0.05/0.13  | 1.62/-      | 0.01/0.47 |
| 27.24       | 839  | Benzyl alcohol          | 0.71/20.42 | 1.51/28.62  | -/24.05   |
| 21.85       | 893  | (-)-Myrtenol            | 5.74/30.49 | 23.15/41.78 | -/31.29   |
| 7.07        | 868  | Ethylbenzene            | 0.45/0.07  | 0.19/0.18   | 2.19/0.66 |
| 7.05        | 875  | M-Xylene                | 2.08/-     | -/-         | -/-       |
| 7.10        | 861  | P-Xylene                | -/-        | 1/-         | -/-       |
| 42.97       | 911  | Eugenol                 | -/3.21     | -/4.2       | -/3.95    |
| 9.81/14.23  | 882  | O-toluic acid           | 1.42/0.63  | -/0.04      | -/Tr      |

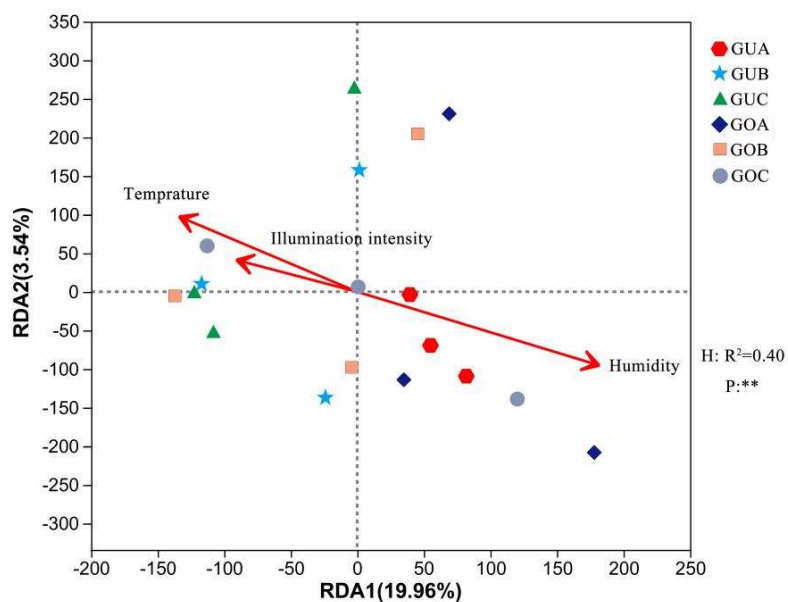

**Figure S3.** Correlations between the endophytic fungal community in *C. praecox* and environmental factors (T: temperature; H: humidity).

**Table S3.** Correlations between endophytic fungal diversity in *C. praecox* with environmental factors.

|                        | GU     | GO     | Total  |
|------------------------|--------|--------|--------|
| Temperature            | 0.543  | 0.556  | 0.550  |
| Humidity               | 0.882* | 0.883* | 0.882* |
| Illumination intensity | 0.715  | 0.715  | 0.715  |
